# Supplementary material for: The CCTL (Cpf1-assisted Cutting and Taq DNA ligase-assisted Ligation) method for efficient editing of large DNA constructs in vitro
Source: PubMed Central journal article supplement — Nucleic Acids Res. 2017 Jan 23;45(9):e74. doi: 10.1093/nar/gkx018 (PMC5436000; doi:10.1093/nar/gkx018), 2017-01-23
Supplement: gkx018_supp.pdf [file gkx018_supp.pdf]

## SUPPLEMENTARY INFORMATION

Supplementary Table S1. oligos used in this work

---

| oligos                  | sequence                                                           |
|-------------------------|--------------------------------------------------------------------|
| target-DNMT1-3-F        | aatgtttcctgatggccatgtctgttactcgccctgtcaagtggcgtgac                 |
| target-DNMT1-3-R        | gtcacgccacttgacaggcgagtaacagacatggaccatcaggaacatt                  |
| target-DNMT1-3-F-FAM    | FAM-aatgtttcctgatggccatgtctgttactcgccctgtcaagtggcgtgac             |
| target-DNMT1-3-F-FAM-3' | aatgtttcctgatggccatgtctgttactcgccctgtcaagtggcgtgac-FAM             |
| target-DNMT1-3-R-FAM    | gtcacgccacttgacaggcgagtaacagacatggaccatcaggaacatt-FAM              |
| target-DNMT1-3-R-FAM-5' | FAM-gtcacgccacttgacaggcgagtaacagacatggaccatcaggaacatt              |
| DNMT1-795-F             | aatgcccagggtgtcctccatctgag                                         |
| DNMT1-795-R             | catgttggggattcctgggtgccagaa                                        |
| pSB1A2-DNMT1-795-F      | <u>caccaggaatccccaacatgggatccactagtctctagctcgag</u>                |
| pSB1A2-DNMT1-795-R      | <u>tggaggacaacctgggcattggatcctttctcctttctag</u>                    |
| T7-crRNA-F              | GAAATTAATACGACTCACTATAGGG                                          |
| T7-T1-14-R              | gaaagttgcgataaATCTACAACAGTAGAAATTCCTATAGTGAGTCGTATT<br><br>AATTTC  |
| T7-T1-15-R              | agaaagttgcgataaATCTACAACAGTAGAAATTCCTATAGTGAGTCGTAT<br><br>TAATTTC |

---

---

|            |                                                                          |
|------------|--------------------------------------------------------------------------|
| T7-T1-16-R | tagaaagttgcgataaATCTACAACAGTAGAAATTCCTATAGTGAGTCGTAT<br>TAATTTTC         |
| T7-T1-17-R | gtagaaagttgcgataaATCTACAACAGTAGAAATTCCTATAGTGAGTCGTA<br>TTAATTTTC        |
| T7-T1-18-R | agtagaaagttgcgataaATCTACAACAGTAGAAATTCCTATAGTGAGTCGT<br>ATTAATTTTC       |
| T7-T1-19-R | cagtagaaagttgcgataaATCTACAACAGTAGAAATTCCTATAGTGAGTCG<br>TATTAATTTTC      |
| T7-T1-20-R | tcagtagaaagttgcgataaATCTACAACAGTAGAAATTCCTATAGTGAGTCG<br>TATTAATTTTC     |
| T7-T1-21-R | ttcagtagaaagttgcgataaATCTACAACAGTAGAAATTCCTATAGTGAGTC<br>GTATTAATTTTC    |
| T7-T1-22-R | attcagtagaaagttgcgataaATCTACAACAGTAGAAATTCCTATAGTGAGTC<br>GTATTAATTTTC   |
| T7-T1-23-R | aattcagtagaaagttgcgataaATCTACAACAGTAGAAATTCCTATAGTGAGT<br>CGTATTAATTTTC  |
| T7-T1-24-R | gaattcagtagaaagttgcgataaATCTACAACAGTAGAAATTCCTATAGTGAG<br>TCGTATTAATTTTC |
| T7-T1-30-R | aagcttgaattcagtagaaagttgcgataaATCTACAACAGTAGAAATTCCTATAG                 |

---

---

|                       |                                                                         |
|-----------------------|-------------------------------------------------------------------------|
|                       | TGAGTCGTATTAATTTTC                                                      |
| T7-DNMT1-3-R          | GAGTAACAGACATGGACCATCAGATCTACAACAGTAGAAATTCCTA<br>TAGTGAGTCGTATTAATTTTC |
| T7-DNMT1-3-crRNA-R-18 | acagacatggaccatcagATCTACAACAGTAGAAATTCCTATAGTGAGTCG<br>TATTAATTTTC      |
| act-crRNA1            | cagctcgctgcactgatatctacaacagtagaaattccctatagtgagtcgtattaattc            |
| act-crRNA2            | acacgtcccaataagttatctacaacagtagaaattccctatagtgagtcgtattaattc            |
| Ermp-F1               | <u>cagtcgactgcactgattaagcccgacccgagcacgcgc</u>                          |
| Ermp-R1               | <u>catggacacgtcccaataagttgaatctaccgctggatcctaccaaccggc</u>              |
| actII-orf4ck-F        | ttccgaggaccagccgtatc                                                    |
| actII-orf4ck-R        | accaattcccggctgctgctc                                                   |
| orf4-RTF              | aaggcgaccagctcctggtg                                                    |
| orf4-RTR              | tggtccgcccaactcctcg                                                     |
| actI-RTF              | cagttcgccgtggcctgtgc                                                    |
| actI-RTR              | atactcgctccaggctgg                                                      |
| actIII-RTF            | tgaccacaccctgcttccg                                                     |
| actIII-RTR            | acgaactctggctcgatgctg                                                   |

---

The overhang sequences in target DNA primers were underlined.

**Supplementary Table S2. Strains and plasmids used in this work**

| Strains/Plasmids           | Description                                                                                                                                                                     | Reference/source  |
|----------------------------|---------------------------------------------------------------------------------------------------------------------------------------------------------------------------------|-------------------|
| <b>Strains</b>             |                                                                                                                                                                                 |                   |
| <i>E. coli</i> DH10B       | F <sup>-</sup> <i>endA1 deoR<sup>+</sup> recA1 galE15 galK16 nupG rpsL Δ(lac)X74 φ80lacZ ΔM15 araD139 Δ(ara,leu)7697 mcrA Δ(mrr-hsdRMS-mcrBC) Str<sup>R</sup> λ<sup>-</sup></i> | Invitrogen        |
| <i>E. coli</i> BL21(DE3)   | F <sup>-</sup> <i>ompT gal dcm lon hsdSB(rB- mB-) λ(DE3 [lacI lacUV5-T7 gene 1 ind1 sam7 nin5])</i>                                                                             | Invitrogen        |
| <i>E. coli</i> ET12567     | <i>dam, dcm, hsdM, hsdS, hsdR, cat, tet</i> , for intergeneric conjugation                                                                                                      | Our lab           |
| <i>Streptomyces</i> sp. 4F | A thermo-streptomyces found in soil                                                                                                                                             | (1)               |
| <b>Plasmids</b>            |                                                                                                                                                                                 |                   |
| pSB1A2                     | pMB1 replication origin (copy number of 100-300 per cell) and ampicillin resistance                                                                                             | iGEM <sup>a</sup> |
| pET28a-TEV                 | pET28a carrying the TEV protease cleavage site                                                                                                                                  | (2)               |
| pSB1A2-DNMT1-3             | pSB1A2 carrying the target of DNMT1-3                                                                                                                                           | This study        |
| pET28a-TEV-FnCpf1          | pET28a-TEV carrying the FnCpf1 encoding gene                                                                                                                                    | (3)               |
| pET28a-TEV-AsCpf1          | pET28a-TEV carrying the AsCpf1 encoding gene                                                                                                                                    | (3)               |
| pET28a-TEV-LbCpf1          | pET28a-TEV carrying the LbCpf1 encoding gene                                                                                                                                    | This study        |
| pHIW                       | A vector carrying the <i>act</i> cluster for actinorhodin expression in <i>Streptomyces</i> sp. 4F                                                                              | (1)               |
| pHIW- <i>ermP</i>          | pHIW with the <i>actII-orf4</i> promoter in <i>act</i> replaced with <i>ermP</i> promoter                                                                                       | This study        |
| pEASY-blunt-zero           | A commercial vector for cloning of genes in a TOPO-cloning way                                                                                                                  | Transgen          |
| pEASY- <i>ermP</i>         | pEASY-blunt-zero carrying the <i>ermP</i> promoter                                                                                                                              | This study        |

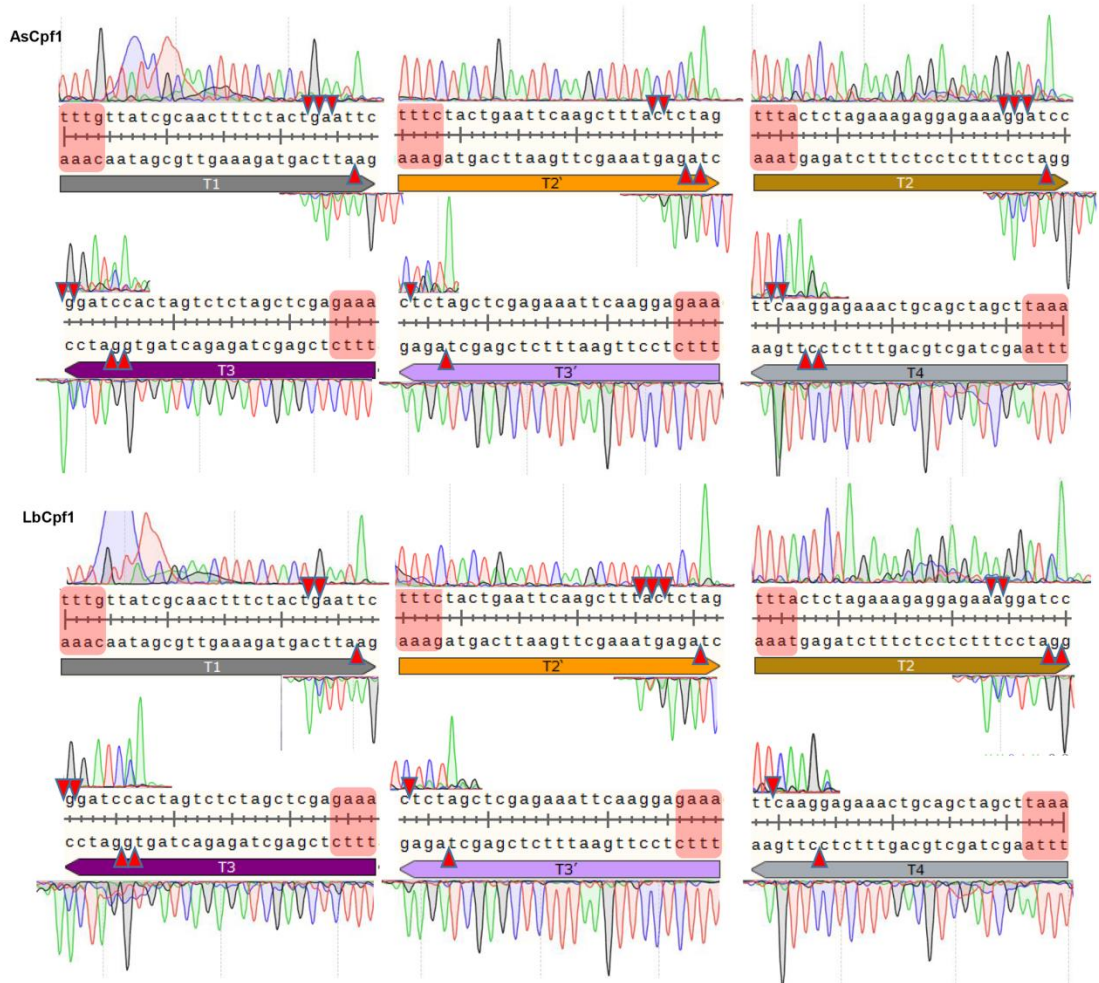

**Supplementary Figure S1. Identification of the cleavage sites of AsCpf1 and LbCpf1 by Sanger DNA sequencing.** The cleavage sites were around the 18<sup>th</sup> base on the non-target strand and the 23<sup>rd</sup> base on the target strand, which were indicated by red triangles based on the Sanger sequencing results. The accuracy of the cleavage varied among the targets and the origins of Cpf1.

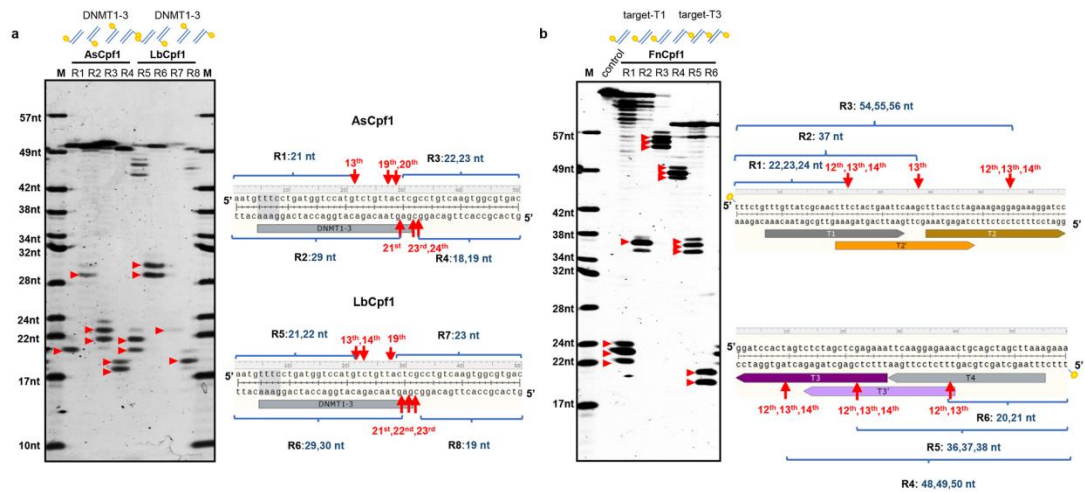

**Supplementary Figure S2. Identification of the Cpf1 cleavage sites by urea PAGE.** (a) Target of DNMT1-3 was labelled with FAM on either the 5'-end or 3'-end on the target or non-target strand. Both AsCpf1 and LbCpf1 showed cleavage activities around 14<sup>th</sup> base on the non-target strand. (b) Digestion of another six targets by FnCpf1. Target DNA was labelled on the 5'-end of the non-target strand. For all reactions (*i.e.* with different crRNAs), FnCpf1 showed obviously cleavage activities around the 14<sup>th</sup> base on the non-target strand.

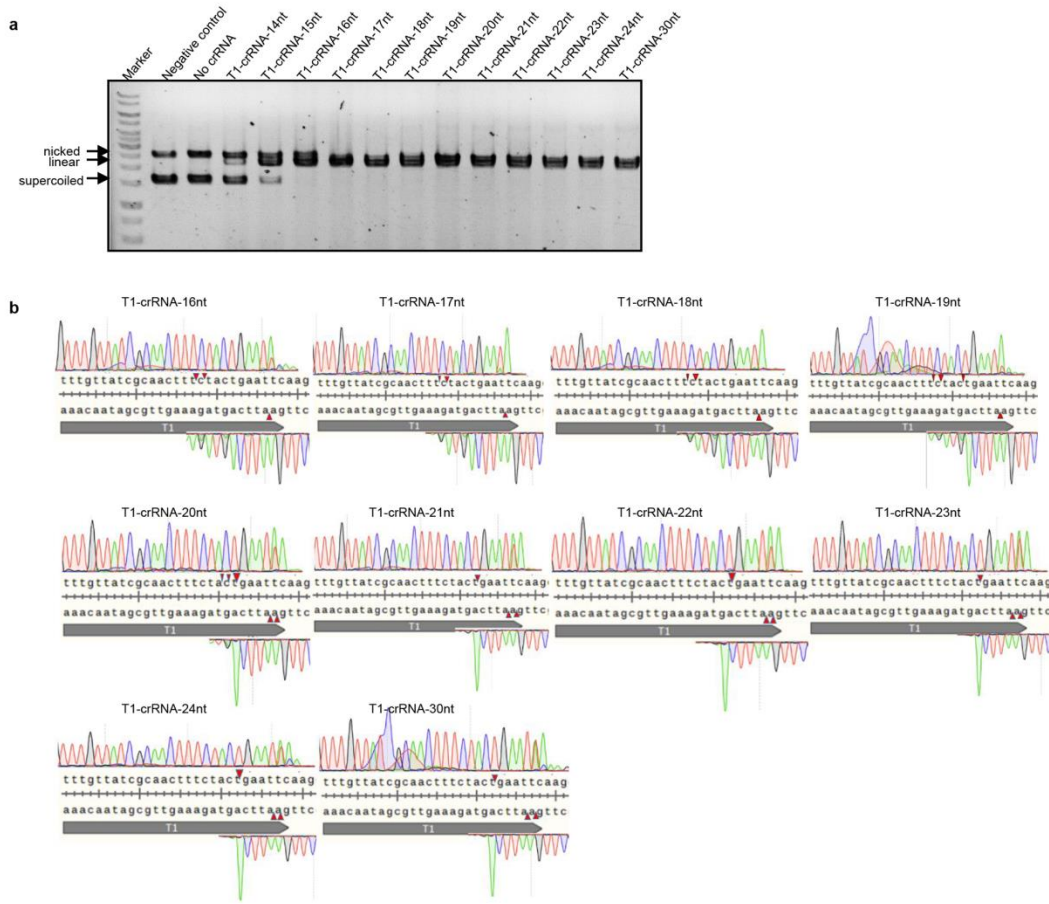

**Supplementary Figure S3. Identification of the FnCpf1 cleavage sites with different length of spacers by Sanger sequencing.** (a) Agarose gel electrophoresis analysis of the products of plasmid pCB1A2 digested by FnCpf1 with different length of spacers in crRNAs. Longer than 17-nt spacer crRNA enabled FnCpf1 with full double-stranded break activity. (b) FnCpf1 with shorter spacer crRNAs (less than 20 nt) had different cleavage sites from those with full-length crRNA (*e.g.* T1-crRNA-24nt). And FnCpf1 cleavage with spacers longer than 20 nt showed similar cleavage profiles in the cleavage sites.

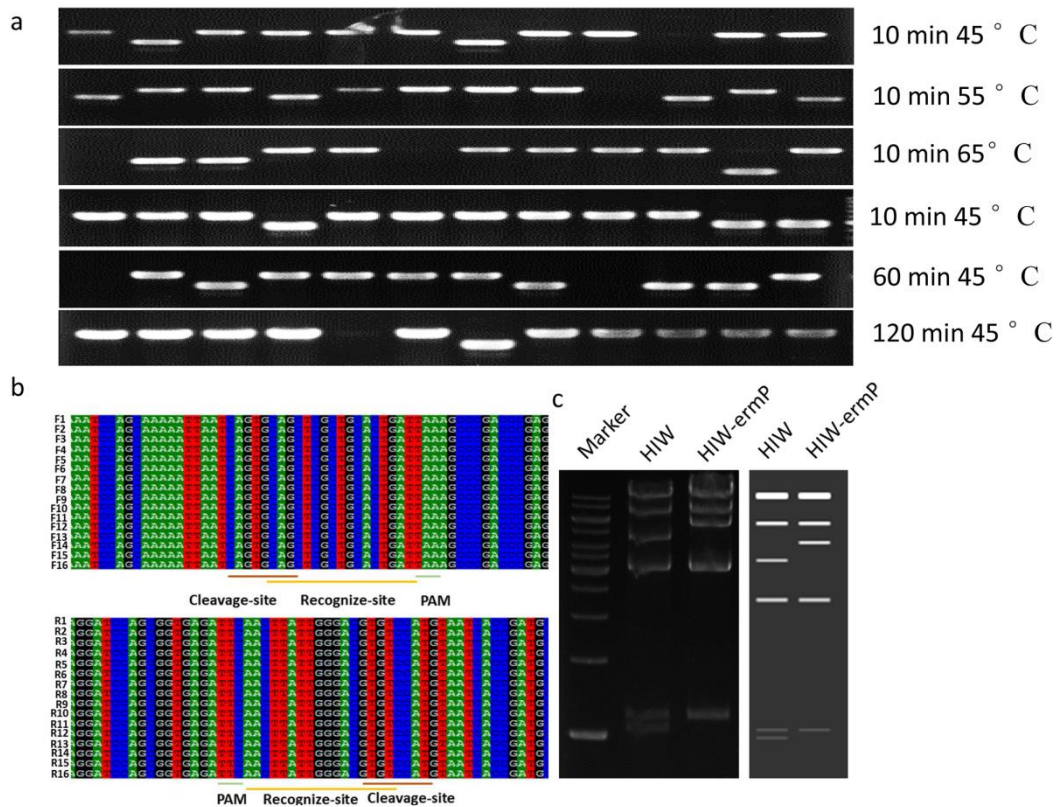

**Supplementary Figure S4. Optimal reaction conditions for the CCTL method using Taq DNA ligase.** (a) Positive rates of CCTL with different reaction temperatures and time courses, which was analyzed by PCR using primers of actII-orf4CKF and actII-orf4CKR. In each reaction condition, PCR bands with larger sizes showed the correct size and indicated positive clones. (b) Verification of the ligation accuracy of the positive clones by Sanger sequencing. The red line represented the cleavage sites, which produced sticky ends for DNA ligation. Spacer sequences were indicated by yellow lines (the Recognize-site), while the PAM sites were shown by green lines. The upper panel showed the sequencing results for the ligation 5'-end of the promoter, while the lower panel showed the 3'-end ligation results. (c) The *Stul*I digestion results of plasmids pHIW and pHIW-*ermP* (left panel), which had the same theoretical restriction profiles as predicted (right panel).

## REFERENCES

1. Chen, W.H., Qin, Z.J., Wang, J. and Zhao, G.P. (2013) The MASTER (methylation-assisted tailorable ends rational) ligation method for seamless DNA assembly. *Nucleic Acids Res.*, **41**, e93.



2. Carneiro, F.R., Silva, T.C., Alves, A.C., Haline-Vaz, T., Gozzo, F.C. and Zanchin, N.I. (2006) Spectroscopic characterization of the tumor antigen NY-REN-21 and identification of heterodimer formation with SCAND1. *Biochem. Biophys. Res. Commun.*, **343**, 260-268.
3. Li, S.Y., Zhao, G.P. and Wang, J. (2016) C-Brick: A New Standard for Assembly of Biological Parts Using Cpf1. *ACS Synth. Biol.*
